# Supplementary material for: Transcriptome Analysis Reveals Potential Regulators of DMI Fungicide Resistance in the Citrus Postharvest Pathogen Penicillium digitatum
Source: MDPI journal article supplement (doi:10.3390/jof10050360), 2024-05-18
Supplement: s1 [file s1]

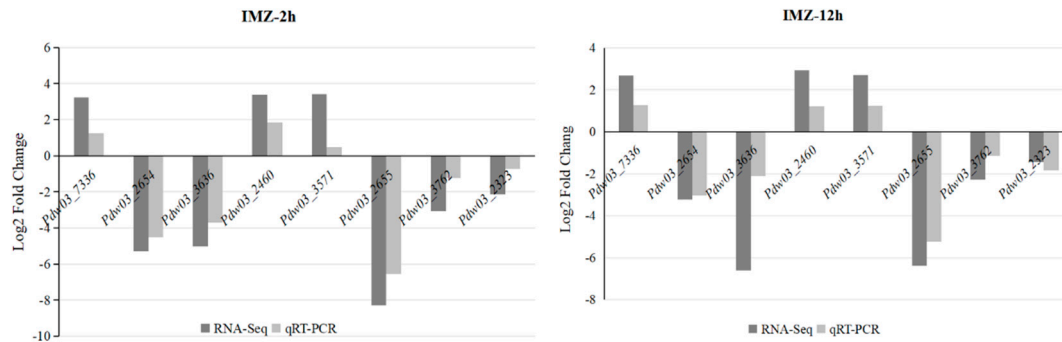

Fig. S1. qRT-PCR validation of the RNA-Seq data.

|                         |                                 |                                 |     |
|-------------------------|---------------------------------|---------------------------------|-----|
| WT                      | AAAGAATTATGTTTGGTATGCTTACGC-TAA | TGGCGTTTATTTAGGTCGGCGACGCAA     | 355 |
| $\Delta Pdw03\_3762-1$  | AAAGAATTATGTTTGGTATGCTTACGC     | CTAATGGCGTTTATTTAGGTCGGCGACGCAA | 356 |
| $\Delta Pdw03\_3762-13$ | AAAGAATTATGTTTGGTATGCTTACGC     | -AATGGCGTTTATTTAGGTCGGCGACGCAA  | 354 |
| WT                      | GCGTACTCTTCCCCGGCCGACCAGCCTC    | TGGCCGGCAGTGCTCCCCCGGGCCCCCAATC | 178 |
| $\Delta Pdw03\_3571-10$ | GCGTACTCTTCCCCGGCCGACCAGCCTC    | TGGCCGGCAGTGCT                  | 177 |
| WT                      | CACCTCACCTCCCAACCTGTCAGCCCC-G   |                                 | 269 |
| $\Delta Pdw03\_2654-5$  | CACCTCACCTCCCAACCTGTCAGCCCC-G   | TCCCGAGCAAAAAGGATTGGAGGAGGAGGAG | 300 |
| $\Delta Pdw03\_2654-6$  | CACCTCACCTCCCAACCTGTCAGCCCC     | CG                              | 270 |
| WT                      |                                 | GGCGGCAAGGCATCTCGAACGAAACCGC    | 298 |
| $\Delta Pdw03\_2654-5$  | GAAGGTGAGAGTGAGACAAAGAGCGAAATAG | GGCGGCAAGGCATCTCGAACGAAACCGC    | 360 |
| $\Delta Pdw03\_2654-6$  |                                 | GGCGGCAAGGCATCTCGAACGAAACCGC    | 299 |

Fig. S2. Sequence alignment of gene locus in the selected mutants. Protospacers were marked in red. Protospacer-adjacent motifs (PAM) were underlined. Nucleotide alterations are highlighted in yellow.

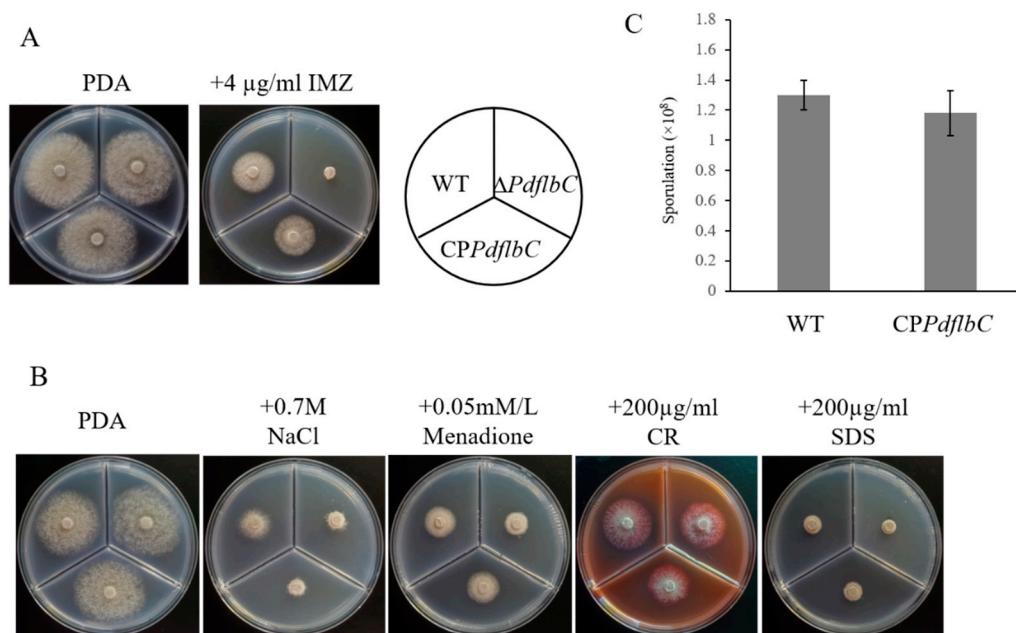

Fig. S3. Phenotypes of the complemented strain  $CPPdw03$ . A) Sensitivity of the wild type, the gene

deletion mutant  $\Delta P_{dfbC}$  and the complemented strain  $CPP_{dfbC}$  to IMZ. B) Sensitivity of the wild type, the gene deletion mutant  $\Delta P_{dfbC}$  and the complemented strain  $CPP_{dfbC}$  to environmental stresses. C) Sporulation of the wild type and the complemented strain  $CPP_{dfbC}$ .
